# Supplementary material for: Functional Analysis of the Coronary Heart Disease Risk Locus on Chromosome 21q22
Source: Hindawi journal article supplement (doi:10.1155/2017/1096916), 2017-01-01
Supplement: f1 [file 1096916.f1.pdf]

**Supplementary Table 1:** Probe sequences for SNPs at the 21q22 CHD risk locus

| SNP - Allele   | Sequence                            |
|----------------|-------------------------------------|
| rs9982601 – C  | CACAGGGCTGCT <u>C</u> CATGGCCTTGGA  |
| rs9982601 – C  | TCCAAGGCCATGGAGCAGCCCTGTG           |
| rs9982601 – T  | CACAGGGCTGCTT <u>C</u> CATGGCCTTGGA |
| rs9982601 – T  | TCCAAGGCCATGAAGCAGCCCTGTG           |
| rs28451064 – G | CCAGGCCAAAGTGGACACCAAATAC           |
| rs28451064 – G | GTATTTGGTGTCCACTTTGGCCTGG           |
| rs28451064 – A | CCAGGCCAAAGTAGACACCAAATAC           |
| rs28451064 – A | GTATTTGGTGTCTACTTTGGCCTGG           |
| rs9980618 – C  | AGGGTGTCTGCTCAGCACACCATG            |
| rs9980618 – C  | CATGGTGTGCTGGAGCAGACACCCT           |
| rs9980618 – T  | AGGGTGTCTGCTCAGCACACCATG            |
| rs9980618 – T  | CATGGTGTGCTGAAGCAGACACCCT           |
| rs60687299 – T | CACTGTATTGAAT <u>A</u> CTGGAGGCAAC  |
| rs60687299 – T | GTTGCCTCCAGT <u>A</u> TTCAATACAGTG  |
| rs60687299 – C | CACTGTATTGAAC <u>A</u> CTGGAGGCAAC  |
| rs60687299 – C | GTTGCCTCCAGT <u>G</u> TTCAATACAGTG  |
| rs9977419 – T  | TGTGATAGTGAGT <u>G</u> AGTTCTTACGA  |
| rs9977419 – T  | TCGTAAGAACTC <u>A</u> CTCACTATCACA  |
| rs9977419 – A  | TGTGATAGTGAG <u>A</u> GAGTTCTTACGA  |
| rs9977419 – A  | TCGTAAGAACTC <u>T</u> CTCACTATCACA  |
| rs9977093 – G  | CCATGCAGAACTGTGAATCAATTAA           |
| rs9977093 – G  | TTAATTGATTCA <u>C</u> AGTTCTGCATGG  |
| rs9977093 – A  | CCATGCAGAACTATGAATCAATTAA           |
| rs9977093 – A  | TTAATTGATTCA <u>T</u> AGTTCTGCATGG  |

The SNP position is underlined. EMSA=electrophoretic mobility shift assay.
